# Supplementary material for: Computational investigation of the speciation of uranyl gluconate complexes in aqueous solution
Source: Royal Society of Chemistry journal article supplement (doi:10.1039/c1dt11086a), 2011-01-01
Supplement: c1dt11086a.pdf [file c1dt11086a.pdf]

# Computational investigation of the speciation of uranyl gluconate complexes in aqueous solution

Krishna Hassomal Birjkumar<sup>1</sup>, Nicholas D. Bryan<sup>2,\*</sup> and Nikolas  
Kaltsoyannis<sup>1,\*</sup>

<sup>1</sup> *Department of Chemistry, University College London, 20 Gordon Street, London WC1H  
0AJ, UK*

<sup>2</sup> *Centre for Radiochemistry Research, School of Chemistry, The University of Manchester,  
Manchester M13 9PL, UK*

## Supplementary Information

Table S1: Gas-Phase  $\Delta G_r$ /kJ/mol for reactions (1)–(4).

| Reaction | pH      | U <sub>4</sub> Geometry | U <sub>5</sub> Geometry | U <sub>6</sub> Geometry |
|----------|---------|-------------------------|-------------------------|-------------------------|
| 1        | Low     | -168.35                 | -169.10                 | -177.63                 |
| 2        | Neutral | -55.13                  | -43.38                  | -48.13                  |
| 3        | High    | -237.28                 | -224.91                 | -219.42                 |
| 4        | V. High | -272.03                 | -274.91                 | -279.96                 |

Table S2: COSMO  $\Delta G_r$ /kJ/mol for reactions (1)–(4).

| Reaction | pH      | U <sub>4</sub> Geometry | U <sub>5</sub> Geometry | U <sub>6</sub> Geometry |
|----------|---------|-------------------------|-------------------------|-------------------------|
| 1        | Low     | -7.97                   | 10.02                   | 8.98                    |
| 2        | Neutral | -24.00                  | -15.73                  | -15.92                  |
| 3        | High    | 65.22                   | 90.96                   | 73.04                   |
| 4        | V. High | 2.98                    | -38.13                  | -37.29                  |

Table S3: Experimental and calculated <sup>13</sup>C NMR chemical shifts  $\delta$ /ppm for D-gluconic acid and  $\text{UO}_2\text{Glu}(\text{H}_2\text{O})(\text{OH})_2^-$  in the U<sub>4</sub>, U<sub>5</sub> and U<sub>6</sub> geometries. MAD = Mean absolute deviation (see Fig. 1 for atom labelling).

| Species                                                                                 | C <sub>1</sub> | C <sub>2</sub> | C <sub>3</sub> | C <sub>4</sub> | C <sub>5</sub> | C <sub>6</sub> | MAD  |
|-----------------------------------------------------------------------------------------|----------------|----------------|----------------|----------------|----------------|----------------|------|
| Experimental <sup>19</sup><br>D-gluconic acid pH 7                                      | 178.8          | 74.1           | 71.0           | 72.5           | 71.2           | 62.6           |      |
| This work,<br>D-gluconate ion                                                           | 176.2          | 84.5           | 78.1           | 93.8           | 81.1           | 72.3           |      |
| Absolute deviation                                                                      | 2.6            | 10.4           | 7.2            | 21.3           | 9.9            | 9.7            | 10.2 |
| Experimental <sup>19</sup><br>Uranyl gluconate pH 11                                    | 191.0          | 88.5           | 85.6           | 77.7           | 74.4           | 65.1           |      |
| This work,<br>$\text{UO}_2\text{Glu}(\text{H}_2\text{O})(\text{OH})_2^-$ U <sub>4</sub> | 186.2          | 84.9           | 76.9           | 83.5           | 75.9           | 69.3           |      |
| Absolute deviation                                                                      | 4.8            | 3.6            | 8.7            | 5.8            | 1.5            | 4.2            | 4.8  |
| This work<br>$\text{UO}_2\text{Glu}(\text{H}_2\text{O})(\text{OH})_2^-$ U <sub>5</sub>  | 177.8          | 80.9           | 77.8           | 83.8           | 75.6           | 68.7           |      |
| Absolute Deviation                                                                      | 13.2           | 7.6            | 7.8            | 6.1            | 1.2            | 3.6            | 6.6  |
| This work<br>$\text{UO}_2\text{Glu}(\text{H}_2\text{O})(\text{OH})_2^-$ U <sub>6</sub>  | 179.1          | 80.9           | 82.5           | 80.9           | 79.6           | 63.6           |      |
| Absolute Deviation                                                                      | 11.9           | 7.6            | 3.1            | 3.2            | 5.2            | 1.5            | 5.4  |

Table S4: COSMO calculated  $\Delta G_r$  kJ/mol for 1:2 Uranyl D-gluconate complexes

| Reaction | Glu 1 / Glu 2 coordination      |                                 | $\Delta G_r$ kJ/mol             |                                 |
|----------|---------------------------------|---------------------------------|---------------------------------|---------------------------------|
|          | U <sub>4</sub> / U <sub>4</sub> | U <sub>5</sub> / U <sub>5</sub> | U <sub>6</sub> / U <sub>6</sub> | U <sub>5</sub> / U <sub>4</sub> |
| 7        | 44.97                           | 48.03                           | 31.99                           |                                 |
| 8        | -34.70                          | -21.73                          | -35.44                          |                                 |
| 9        | 99.30                           | 94.61                           | 99.02                           |                                 |
| 10       |                                 | 149.21                          |                                 | 128.70                          |
| 11       |                                 | 79.27                           |                                 | 62.86                           |
| 12       |                                 |                                 |                                 | 170.40                          |
| 13       |                                 |                                 |                                 | 90.73                           |

Table S5: COSMO calculated  $\Delta G_r$  /kJ/mol for 1:3 UO<sub>2</sub>Glu<sub>3</sub><sup>-</sup> complexes

| Reaction | pH      | U <sub>4</sub> Geometry | U <sub>5</sub> Geometry | U <sub>6</sub> Geometry |
|----------|---------|-------------------------|-------------------------|-------------------------|
| 14       | Low     | 116.28                  | 128.92                  | 138.29                  |
| 15       | Neutral | 20.59                   | 33.23                   | 42.59                   |
| 16       | High    | -1.78                   | 10.86                   | 20.22                   |
